# Supplementary material for: Restraint Stress-Induced Immunosuppression Is Associated with Concurrent Macrophage Pyroptosis Cell Death in Mice
Source: MDPI journal article supplement (doi:10.3390/ijms241612877), 2023-08-17
Supplement: s1 [file s1]

# Restraint Stress-Induced Immunosuppression Is Associated with Concurrent Macrophage Pyroptosis Cell Death in Mice

Chi-Cheng Li <sup>1,2</sup>, Rina Munalisa <sup>3</sup>, Hsuan-Yun Lee <sup>3</sup>, Te-Sheng Lien <sup>3</sup>, Hao Chan <sup>3</sup>, Shih-Che Hung <sup>3</sup>, Der-Shan Sun <sup>3</sup>, Ching-Feng Cheng <sup>4,5</sup> and Hsin-Hou Chang <sup>3,\*</sup>

<sup>1</sup> Department of Hematology and Oncology, Buddhist Tzu Chi General Hospital, Hualien 970, Taiwan; kevinlcc1234@gmail.com

<sup>2</sup> Center of Stem Cell & Precision Medicine, Hualien Tzu Chi Hospital, Hualien 970, Taiwan

<sup>3</sup> Department of Molecular Biology and Human Genetics, Tzu-Chi University, Hualien 970, Taiwan; 108727110@gms.tcu.edu.tw (R.M.); 109727102@gms.tcu.edu.tw (H.-Y.L.); alan211@mail.tcu.edu.tw (T.-S.L.); chanhao1011@gmail.com (H.C.); 102353113@gms.tcu.edu.tw (S.-C.H.); dssun@mail.tcu.edu.tw (D.-S.S.)

<sup>4</sup> Department of Pediatrics, Taipei Tzu Chi Hospital, Buddhist Tzu Chi Medical Foundation, Taipei 231, Taiwan; chengcf@mail.tcu.edu.tw

<sup>5</sup> Institute of Biomedical Sciences, Academia Sinica, Taipei 115, Taiwan

\* Correspondence: hhchang@mail.tcu.edu.tw; Tel.: +886-3-8565301 (ext. 2667)

**Key words:** Restraint stress, immunosuppression, macrophage, cell death, pyroptosis, psychological stress, ambient cold exposure, intravenous immunoglobulin

**Figures S1:** pages 2

# Supplemental Figure S1

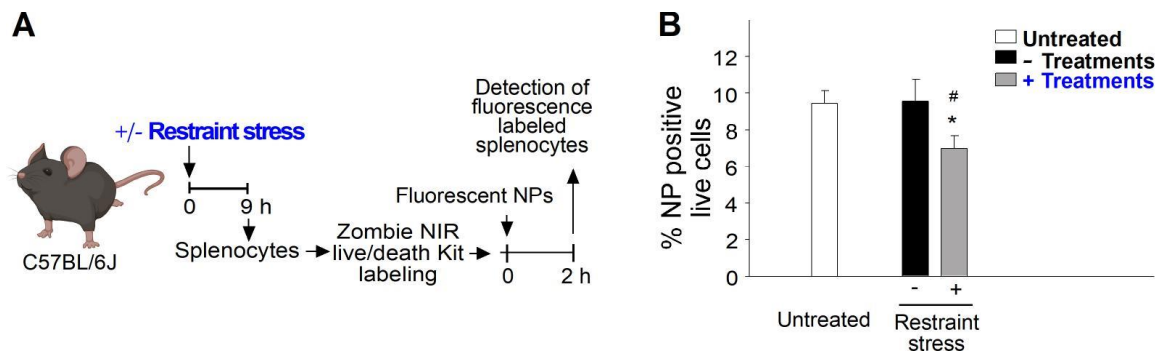

**Figure S1.** Restraint stress suppressed the live phagocyte function as indicated by the suppression on the engagement between live splenic macrophage and fluorescent nanoparticles (NPs) in mice. **(A)** Experiment outline, and **(B)** percentages of NP-engaged live cells are indicated. Live splenocyte populations of respective groups were normalized to 100 %. \*  $P < 0.05$ , vs. respective 0 h groups (untreated); #  $P < 0.05$ , vs. respective no stress (-restraint stress) groups.  $n = 6$  (three experiments with total 6 mice per group). Live cell populations were determining using a live/dead cell labeling kit (Zombie NIR™ Fixable Viability Kit, Biolegend).
